# Supplementary material for: An analysis modality for vascular structures combining tissue-clearing technology and topological data analysis
Source: PubMed Central journal article supplement (PMC9468184; doi:10.1038/s41467-022-32848-2), 2022-09-12
Supplement: 41467_2022_32848_MOESM2_ESM.pdf [file 41467_2022_32848_MOESM2_ESM.pdf]

**Title:** Supplementary Movie 1.

**Description:** Visualization of blood vessels in mouse kidney.

**Title:** Supplementary Movie 2.

**Description:** Visualization of lymphatic vessels in mouse lung.

**Title:** Supplementary Movie 3.

**Description:** Classified signals of brain blood vessels by ilastik.
